# Supplementary material
Source: HighWire-hosted journal article supplement (https://gut.bmj.com/content/gutjnl-2020-321016)
Supplement: inline-supplementary-material-2 [file inline-supplementary-material-2.xlsx]

## Sheet: S1A-C Training validation cohts
Supplementary Table 1A. Summary characteristics for TRAINING COHORT (microarray profiled) of 72 samples that represent the 4 subtypes
PanNET subtype	Number of Samples (%)	Material used in expression profiling	Primary tumours with liver Metastasis	WHO Grade
Insulinoma-like	16/72 (22%)	All primary tumours	0/16 (0%)	13/16 (81%) G1 3/16 (19%) G2
Intermediate	25/72 (35%)	24/25 (96%) Primary 1/25 (4%) LN met	4/24 (17%)	18/24 (75%) G1 6/24 (25%) G2
MLP-1	20/72 (28%)	19/20 (95%) Primary 1/20 (5%) LN Met	9/19 (47%)	4/19 (21%) G1 11/19 (58%) G2 4/19 (21%) G3
MLP-2	11/72 (15%)	6/11 (55%) Primary 5/11 (45%) Metastases	4/6 (67%)	2/6 (33%) G1 4/6 (67%) G2
All Samples	72	65 (90%) Primary 7 (10%) Metastases	17/65(26%)	37/65 (57%)G1 24/65 (37%) G2 4/65 (6%) G3
Supplementary Table 1B. Summary characteristics for VALIDATION COHORT-1 (RNAseq profiled) of 109 samples that represent the 4 subtypes
PanNET subtype	Number of Samples (%)	Material used in expression profiling	Primary tumours with liver Metastasis	WHO Grade
Insulinoma-like	19/109 (17%)	All primary tumours	1/19 (5%)	16/19 (84%) G1 3/19 (16%) G2
Intermediate	43/109 (40%)	All primary tumours	6/43 (14%)	21/43 (49%) G1 22/43 (51%) G2
MLP-1	28/109 (26%)	All primary tumours	9/28(32%)	12/28 (43%) G1 12/28 (43%) G2 3/28 (10%) G3 1/28 (4%) NA
MLP-2	19/109 (17%)	All primary tumours	2/19(11%)	7/19 (37%) G1 12/19 (63%) G2
All Samples	109	All primary tumours	18/109(17%)	56/109 (51%) G1 49/109 (45%) G2 3/109 (3%) G3 1/109 (1%) NA
Supplementary Table 1C. Summary characteristics for VALIDATION COHORT-2 (microarray profiled) of 26 samples that represent the 4 subtypes
PanNET subtype	Number of Samples (%)	Material used in expression profiling	Primary tumours with liver Metastasis	WHO Grade
Insulinoma-like	5/26 (19%)	All primary tumours	0/5 (0%)	3/5 (60%) G1 2/5 (40%) G2
Intermediate	7/26 (27%)	4/7 (57%) Primary 3/7 (43%) Metastases	2/7 (29%)	3/7 (43%) G1 3/7(43%) G2 1/7 (14%) G3
MLP-1	8/26 (31%)	3/8 (38%) Primary 5/8 (62%) Metastases	2/8 (25%)	1/8 (12%) G1 4/8 (50%) G2 3/8 (38%) G3
MLP-2	6/26 (23%)	All primary tumours	0/6 (0%)	1/8 (17%) G1 3/6 (50%) G2 2/6 (33%) G3
All Samples	26	18/26 (69%) Primary 8/26 (31%) Metastases	4/26 (15%)	8/26 (31%) G1 12/26 (46%) G2 6/26 (23%) G3

## Sheet: S1D Validation coho2 Subtypes
Supplementary Table 1D -Validation (RNASeq) cohort-1 subtypes predicted
using NMF analysis with 221 PanNetAssigner genes.
None of the samples overlap with the tranining cohort.
S.No	Samples	Subtypes
1	1001	Insulinoma-like
2	1262	Insulinoma-like
3	1266	Insulinoma-like
4	1317	Insulinoma-like
5	1508	Insulinoma-like
6	1510	Insulinoma-like
7	1517	Insulinoma-like
8	1671	Insulinoma-like
9	1917	Insulinoma-like
10	1941	Insulinoma-like
11	2068	Insulinoma-like
12	2184	Insulinoma-like
13	2455	Insulinoma-like
14	2456	Insulinoma-like
15	2476	Insulinoma-like
16	2503	Insulinoma-like
17	2541	Insulinoma-like
18	2545	Insulinoma-like
19	2582	Insulinoma-like
20	1000	Intermediate
21	1050	Intermediate
22	1053	Intermediate
23	1163	Intermediate
24	1192	Intermediate
25	1246	Intermediate
26	1273	Intermediate
27	1286	Intermediate
28	1288	Intermediate
29	1293	Intermediate
30	1301	Intermediate
31	1312	Intermediate
32	1366	Intermediate
33	1469	Intermediate
34	1484	Intermediate
35	1493	Intermediate
36	1500	Intermediate
37	1501	Intermediate
38	1512	Intermediate
39	1523	Intermediate
40	1663	Intermediate
41	1745	Intermediate
42	1772	Intermediate
43	1876	Intermediate
44	1918	Intermediate
45	2181	Intermediate
46	2182	Intermediate
47	2194	Intermediate
48	2257	Intermediate
49	2285	Intermediate
50	2292	Intermediate
51	2353	Intermediate
52	2430	Intermediate
53	2467	Intermediate
54	2671	Intermediate
55	2692	Intermediate
56	2812	Intermediate
57	2884	Intermediate
58	3313	Intermediate
59	3328	Intermediate
60	3728	Intermediate
61	797	Intermediate
62	968	Intermediate
63	1027	MLP-1
64	1047	MLP-1
65	1265	MLP-1
66	1274	MLP-1
67	1308	MLP-1
68	1314	MLP-1
69	1473	MLP-1
70	1474	MLP-1
71	1486	MLP-1
72	1489	MLP-1
73	1507	MLP-1
74	1520	MLP-1
75	1661	MLP-1
76	1703	MLP-1
77	1861	MLP-1
78	1927	MLP-1
79	1932	MLP-1
80	2045	MLP-1
81	2236	MLP-1
82	2420	MLP-1
83	2458	MLP-1
84	2470	MLP-1
85	2531	MLP-1
86	3423	MLP-1
87	3731	MLP-1
88	3797	MLP-1
89	700	MLP-1
90	993	MLP-1
91	1134	MLP-2
92	1311	MLP-2
93	1320	MLP-2
94	1322	MLP-2
95	1518	MLP-2
96	1519	MLP-2
97	1651	MLP-2
98	1664	MLP-2
99	1871	MLP-2
100	2328	MLP-2
101	2498	MLP-2
102	2917	MLP-2
103	3264	MLP-2
104	3352	MLP-2
105	3646	MLP-2
106	3667	MLP-2
107	673	MLP-2
108	695	MLP-2
109	833	MLP-2

## Sheet: S2A SAM Analysis - Subtypes
Supplementary Table 2A SAM analysis between PanNET subtypes and 600 immune genes
in PanNETs in training cohort
SAM Analysis for the Two-Class Unpaired Case Assuming Unequal Variances
Serial no.	Delta	False calls	Called genes	FDR
1	0.1	548.14	588	0.210857
2	2.7	10.8	241	0.010136
3	5.2	0.46	132	0.000788
4	7.8	0.02	68	6.65e-05
5	10.4	0	33	0
6	12.9	0	22	0
7	15.5	0	8	0
8	18.1	0	6	0
9	20.7	0	1	0
10	23.2	0	1	0

## Sheet: S2B 132 Genes - 4 Subtypes
Supplementary Table 2B. 132 genes from SAM analysis between
PanNET subtypes and 600 immune genes, classified according
to subtype with highest expression
S.No	Genes	Subtypes
1	TNFRSF11A	Insulinoma-like
2	STAT2	Insulinoma-like
3	THBD	Insulinoma-like
4	GTF3C1	Insulinoma-like
5	NEFL	Insulinoma-like
6	ALCAM	Insulinoma-like
7	IFIT1	Insulinoma-like
8	ENG	Insulinoma-like
9	TFEB	Insulinoma-like
10	CCND3	Insulinoma-like
11	STAT4	Insulinoma-like
12	MNX1	Insulinoma-like
13	BID	Intermediate
14	TNFRSF1A	Intermediate
15	ITGA2	Intermediate
16	CD55	Intermediate
17	TNFSF10	Intermediate
18	LAMP2	Intermediate
19	IL18R1	Intermediate
20	VEGFC	Intermediate
21	CD63	Intermediate
22	C8B	Intermediate
23	CEACAM1	Intermediate
24	CD46	Intermediate
25	IL13RA2	Intermediate
26	MRC1	Intermediate
27	CD164	Intermediate
28	CCL13	Intermediate
29	S100A7	Intermediate
30	CCL26	Intermediate
31	ARG1	Intermediate
32	IL6R	Intermediate
33	CLU	Intermediate
34	SPP1	MLP-1
35	CXCR4	MLP-1
36	PDGFC	MLP-1
37	LIF	MLP-1
38	FCGR1A	MLP-1
39	ADA	MLP-1
40	TLR3	MLP-1
41	KIT	MLP-1
42	LY96	MLP-1
43	LAG3	MLP-1
44	TNFSF13B	MLP-1
45	COL3A1	MLP-1
46	CDK1	MLP-1
47	IFI16	MLP-1
48	ENTPD1	MLP-1
49	CCRL2	MLP-1
50	PSMB9	MLP-1
51	CASP1	MLP-1
52	PBK	MLP-1
53	MAP4K2	MLP-1
54	CTSS	MLP-1
55	ISG15	MLP-1
56	C1QA	MLP-1
57	NCF4	MLP-1
58	THBS1	MLP-1
59	IL8	MLP-1
60	ANXA1	MLP-1
61	TLR2	MLP-1
62	DUSP6	MLP-1
63	TREM2	MLP-1
64	PSMB8	MLP-1
65	FCER1G	MLP-1
66	TREM1	MLP-1
67	FAS	MLP-1
68	CCL5	MLP-1
69	FN1	MLP-1
70	CASP10	MLP-1
71	CCR7	MLP-1
72	POU2AF1	MLP-1
73	PTPRC	MLP-1
74	APOE	MLP-1
75	IL2RB	MLP-1
76	CFI	MLP-1
77	CTAG1B	MLP-1
78	MSR1	MLP-1
79	BLNK	MLP-1
80	TLR7	MLP-1
81	PYCARD	MLP-1
82	CCR5	MLP-1
83	IL18	MLP-1
84	PDCD1LG2	MLP-1
85	PPARG	MLP-1
86	HLA-DPA1	MLP-1
87	TLR4	MLP-1
88	C1QB	MLP-1
89	TRAF6	MLP-1
90	MCAM	MLP-1
91	CD53	MLP-1
92	RIPK2	MLP-1
93	GATA3	MLP-1
94	PSMB10	MLP-1
95	PDGFRB	MLP-1
96	CD274	MLP-1
97	ITGA5	MLP-1
98	IL10RA	MLP-1
99	CD58	MLP-1
100	LCK	MLP-1
101	IFIT2	MLP-1
102	CEACAM6	MLP-1
103	MAP3K1	MLP-1
104	DPP4	MLP-1
105	IFNAR1	MLP-1
106	DUSP4	MLP-1
107	CLEC4A	MLP-1
108	HSD11B1	MLP-2
109	C1S	MLP-2
110	C1R	MLP-2
111	CCL19	MLP-2
112	NFATC2	MLP-2
113	INPP5D	MLP-2
114	CXCL10	MLP-2
115	LTK	MLP-2
116	IL15RA	MLP-2
117	F12	MLP-2
118	IL13RA1	MLP-2
119	ST6GAL1	MLP-2
120	TXNIP	MLP-2
121	C4BPA	MLP-2
122	IL12A	MLP-2
123	ITK	MLP-2
124	MPPED1	MLP-2
125	C8A	MLP-2
126	ICAM4	MLP-2
127	C8G	MLP-2
128	PVR	MLP-2
129	C9	MLP-2
130	CCL15	MLP-2
131	NOD2	MLP-2
132	CYLD	MLP-2

## Sheet: S2C Gene overlap cohorts
Supplementary Table 2C Matched genes across validation cohorts with 132 gene from training cohort SAM analysis.
In our previous SAM analysis, we determined that 132 immune genes were differentially expressed in the training cohort.
We repeated SAM analyses to establish which of these 132 immune genes were differentially expressed
according to PanNET subtype in the validation cohorts.
S.No	Training cohort dataset	Validation cohort 1 dataset	Validation cohort 2 dataset
1	ADA	ADA	ADA
2	ALCAM	ALCAM	ALCAM
3	ANXA1	ANXA1	ANXA1
4	APOE	APOE	APOE
5	ARG1	ARG1	ARG1
6	BID	BID	BID
7	BLNK	BLNK	BLNK
8	C1QA	C1QA	C1QA
9	C1QB	C1QB	C1QB
10	C1R	C1R	C1R
11	C1S	C1S	C1S
12	C4BPA	C4BPA	C4BPA
13	C8A	C8A	C8A
14	C8B	C8B	C8B
15	C8G	C8G	C8G
16	C9	C9	C9
17	CASP1	CASP1	CASP1
18	CASP10	CASP10	CASP10
19	CCL13	CCL13	CCL13
20	CCL15	CCL15	CCL19
21	CCL19	CCL19	CCL26
22	CCL26	CCL26	CCL5
23	CCL5	CCL5	CCND3
24	CCND3	CCND3	CCR5
25	CCR5	CCR5	CCR7
26	CCR7	CCR7	CCRL2
27	CCRL2	CCRL2	CD164
28	CD164	CD164	CD274
29	CD274	CD274	CD46
30	CD46	CD46	CD53
31	CD53	CD53	CD55
32	CD55	CD55	CD58
33	CD58	CD58	CD63
34	CD63	CD63	CEACAM1
35	CDK1	CDK1	CEACAM6
36	CEACAM1	CEACAM1	CFI
37	CEACAM6	CEACAM6	CLEC4A
38	CFI	CFI	CLU
39	CLEC4A	CLEC4A	COL3A1
40	CLU	CLU	CTSS
41	COL3A1	COL3A1	CXCL10
42	CTAG1B	CTAG1B	CXCR4
43	CTSS	CTSS	CYLD
44	CXCL10	CXCL10	DPP4
45	CXCR4	CXCR4	DUSP4
46	CYLD	CYLD	DUSP6
47	DPP4	DPP4	ENG
48	DUSP4	DUSP4	ENTPD1
49	DUSP6	DUSP6	F12
50	ENG	ENG	FAS
51	ENTPD1	ENTPD1	FCER1G
52	F12	F12	FN1
53	FAS	FAS	GATA3
54	FCER1G	FCER1G	GTF3C1
55	FCGR1A	FCGR1A	HLA-DPA1
56	FN1	FN1	HSD11B1
57	GATA3	GATA3	ICAM4
58	GTF3C1	GTF3C1	IFI16
59	HLA-DPA1	HLA-DPA1	IFIT1
60	HSD11B1	HSD11B1	IFIT2
61	ICAM4	IFI16	IFNAR1
62	IFI16	IFIT1	IL10RA
63	IFIT1	IFIT2	IL12A
64	IFIT2	IFNAR1	IL13RA1
65	IFNAR1	IL10RA	IL13RA2
66	IL10RA	IL12A	IL15RA
67	IL12A	IL13RA1	IL18
68	IL13RA1	IL13RA2	IL18R1
69	IL13RA2	IL15RA	IL2RB
70	IL15RA	IL18	IL6R
71	IL18	IL18R1	IL8
72	IL18R1	IL2RB	INPP5D
73	IL2RB	IL6R	ISG15
74	IL6R	IL8	ITGA2
75	IL8	INPP5D	ITGA5
76	INPP5D	ISG15	ITK
77	ISG15	ITGA2	KIT
78	ITGA2	ITGA5	LAG3
79	ITGA5	ITK	LAMP2
80	ITK	KIT	LCK
81	KIT	LAG3	LIF
82	LAG3	LAMP2	LTK
83	LAMP2	LCK	LY96
84	LCK	LIF	MAP3K1
85	LIF	LTK	MAP4K2
86	LTK	LY96	MCAM
87	LY96	MAP3K1	MNX1
88	MAP3K1	MAP4K2	MPPED1
89	MAP4K2	MCAM	MRC1
90	MCAM	MNX1	MSR1
91	MNX1	MPPED1	NCF4
92	MPPED1	MRC1	NEFL
93	MRC1	MSR1	NFATC2
94	MSR1	NCF4	NOD2
95	NCF4	NEFL	PBK
96	NEFL	NFATC2	PDCD1LG2
97	NFATC2	NOD2	PDGFC
98	NOD2	PBK	PDGFRB
99	PBK	PDCD1LG2	POU2AF1
100	PDCD1LG2	PDGFC	PPARG
101	PDGFC	PDGFRB	PSMB10
102	PDGFRB	POU2AF1	PSMB8
103	POU2AF1	PPARG	PSMB9
104	PPARG	PSMB10	PTPRC
105	PSMB10	PSMB8	PVR
106	PSMB8	PSMB9	PYCARD
107	PSMB9	PTPRC	RIPK2
108	PTPRC	PVR	S100A7
109	PVR	PYCARD	SPP1
110	PYCARD	RIPK2	ST6GAL1
111	RIPK2	S100A7	STAT2
112	S100A7	SPP1	STAT4
113	SPP1	ST6GAL1	TFEB
114	ST6GAL1	STAT2	THBD
115	STAT2	STAT4	THBS1
116	STAT4	TFEB	TLR2
117	TFEB	THBD	TLR3
118	THBD	THBS1	TLR4
119	THBS1	TLR2	TLR7
120	TLR2	TLR3	TNFRSF11A
121	TLR3	TLR4	TNFRSF1A
122	TLR4	TLR7	TNFSF10
123	TLR7	TNFRSF11A	TNFSF13B
124	TNFRSF11A	TNFRSF1A	TRAF6
125	TNFRSF1A	TNFSF10	TREM1
126	TNFSF10	TNFSF13B	TREM2
127	TNFSF13B	TRAF6	TXNIP
128	TRAF6	TREM1	VEGFC
129	TREM1	TREM2
130	TREM2	TXNIP
131	TXNIP	VEGFC
132	VEGFC

## Sheet: S2D SAM Analysis - Grades
Supplementary Table 2D SAM analysis between different grades and 600 immune genes in PanNETs in training cohort
SAM Analysis for the Multi-Class Case with 3 Classes
s0 = 0
Number of permutations: 100
MEAN number of falsely called variables is computed.
Serial no.	Delta	False calls	Called genes	FDR
1	0.1	471.03	525	0.5213
2	1.4	31.07	117	0.1543
3	2.6	4.79	38	0.0732
4	3.9	0.55	12	0.0266
5	5.2	0.39	9	0.0252
6	6.4	0.05	2	0.0145
7	7.7	0	1	0
8	9	0	1	0
9	10.2	0	1	0
10	11.5	0	1	0
SAM analysed significant immune genes expressed between different grades of PanNETs
Only 12 genes were significantly identified with false calls less than 1 and FDR<0.05
No	Genes
1	CCND3
2	CD27
3	CDK1
4	CYLD
5	HSD11B1
6	IL6R
7	KIT
8	LAG3
9	MAGEC1
10	PBK
11	TNFRSF11B
12	TTK

## Sheet: S2E SAM Analysis - MEN1
Supplementary Table 2E SAM analysis between primary tumors with and without MEN1 mutation and
600 immune genes in PanNETs in training cohort
SAM Analysis for the Two-Class Unpaired Case Assuming Unequal Variances
Serial no.	Delta	False calls	Called genes	FDR
1	0.1	386.76	428	0.795
2	0.3	84.57	135	0.5511
3	0.6	12.05	42	0.2524
4	0.8	5.74	32	0.1578
5	1.1	0.79	12	0.0579
6	1.3	0.09	6	0.0132
7	1.5	0.09	6	0.0132
8	1.8	0.01	2	0.0044
9	2	0	1	0
10	2.3	0	0	0
SAM analysed significant immune genes expressed between primary PanNETs
with and without MEN1 mutation
Only 6 genes were significantly identified with false calls less than 1 and FDR<0.05
No	Genes
1	CREB5
2	C8B
3	MRC1
4	CLU
5	IL13RA2
6	F2RL1

## Sheet: S2F SAM Analysis - DAXXATRX 
Supplementary Table 2F SAM analysis between primary tumors with and without DAXX/ATRX mutation and 600 immune genes in PanNETs in training cohort
SAM Analysis for the Two-Class Unpaired Case Assuming Unequal Variances
Serial no.	Delta	False calls	Called genes	FDR
1	0.1	233.29	344	0.534
2	0.3	200.18	315	0.50039
3	0.5	178.8	297	0.47404
4	0.7	58.55	165	0.27941
5	0.9	6.76	47	0.11325
6	1.1	2.45	34	0.05674
7	1.3	0.2	9	0.0175
8	1.5	0.08	8	0.00787
9	1.7	0	2	0
10	1.9	0	0	0
SAM analysed significant immune genes expressed between primary PanNETs with and without DAXX/ATRX mutation
Only 9 genes were significantly identified with false calls less than 1 and FDR<0.05
No	Genes
1	CCL26
2	BID
3	CLEC4A
4	LCP1
5	C4BPA
6	CEACAM1
7	PVR
8	EP300
9	MNX1

## Sheet: S2G SAM Analysis - MTOR
Supplementary Table 2G SAM analysis between primary tumors with and without MTOR pathway (PTEN and TSC2) mutations and 600 immune genes in PanNETs in training cohort
SAM Analysis for the Two-Class Unpaired Case Assuming Unequal Variances
Serial no.	Delta	False calls	Called genes	FDR
1	0.1	186.36	302	0.333
2	0.2	185.05	300	0.3329
3	0.3	180.75	298	0.3273
4	0.4	35.17	109	0.1741
5	0.5	5.6	31	0.0975
6	0.6	1.21	10	0.0653
7	0.7	0.24	3	0.0432
8	0.8	0	0	0
9	0.9	0	0	0
10	1	0	0	0
SAM analysed significant immune genes expressed between primary PanNETs with and without MTOR pathway (PTEN and TSC2) mutations
Only 3 genes were significantly identified with false calls less than 1 and FDR<0.05
No	Genes
1	ENTPD1
2	PDGFRB
3	SPP1

## Sheet: S2H SAM analysis - T-stages
Supplementary Table 2H SAM analysis between different tumor stages (T-stage) and 600 immune genes in PanNETs in training cohort
SAM Analysis for the Two-Class Unpaired Case Assuming Unequal Variances
Serial no.	Delta	False calls	Called genes	FDR
1	0.1	468.18	515	0.5352
2	0.4	204.62	323	0.3729
3	0.7	72.6	173	0.247
4	1	19.45	68	0.1684
5	1.2	5.21	24	0.1278
6	1.5	2.26	13	0.1023
7	1.8	0.52	5	0.0612
8	2.1	0.33	4	0.0486
9	2.4	0.08	2	0.0235
10	2.7	0	0	0
SAM analysed significant immune genes expressed between different tumor stages (T-stage)
Only 4 genes were significantly identified with false calls less than 1 and FDR<0.05
None of the genes were specific to any T-stage.
No	Genes
1	APOE
2	BCL2
3	CCND3
4	STAT4

[truncated: 16 more sheets: S2I SAM analysis - tumor size, S3A Hypoxia, Necroptosis, DC, S3B Hypoxia Score Proportions, S3C Tumour Size by Subtype, S3D Necroptosis Proportions, S4A DAMP genes, S4B DAMP and Necroptosis Corr, S4C TLR3 Proportions, S4D Gene Card Results MLP-1, S4E GSEA MLP-1 vs. ALL, S5A Rooney MLP-1, S5B Rooney ssGSEA, S5C Macrophage Genes, S5D ssGSEA validation cohort-1, S5E ssGSEA validation cohort-2, S6 mIHC]
